# Supplementary material
Source: PubMed Central journal article supplement (PMC3944993)
Supplement: mmc1.pdf [file mmc1.pdf]

# **The Wall-stress Footprint of Blood Cells Flowing in Microvessels**

Jonathan B. Freund<sup>†\*</sup> and Julien Vermot<sup>‡</sup>

<sup>†</sup> Mechanical Science & Engineering and Aerospace Engineering, University of Illinois at Urbana–Champaign, Urbana, IL 61801; <sup>‡</sup> IGBMC, CNRS/INSERM/UdS, BP.10142, F-67404 Illkirch, France.

Five movies:

Movie S1. Animated Wall Traction Visualizations for Case in Figure 4.

Movie S2. Animated Wall Traction Visualizations for Case in Figure 5.

Movie S3. Animated Wall Traction Visualizations for Case in Figure 6.

Movie S4. Animated Wall Traction Visualizations for Case in Figure 10.

Movie S5. Animated Wall Traction Visualizations for Case in Figure 11.
